# Supplementary material
Source: MDPI journal article supplement (https://www.mdpi.com/search?q=climate-08-00092)

Type of the Paper (Article)

# Greening and Browning Trends of Vegetation in India and Their Responses to Climatic and Non-Climatic Drivers

Bikash Ranjan Parida <sup>1,\*</sup>, Arvind Chandra Pandey <sup>1</sup> and N.R. Patel <sup>2</sup>

<sup>1</sup> Department of Geoinformatics, School of Natural Resource Management, Central University of Jharkhand, Ranchi–835205; bikashrp@gmail.com; arvindchandrap@yhaoo.com

<sup>2</sup> Department of Agriculture & Soil, Indian Institute of Remote Sensing, Indian Space Research Organisation, Dehradun-248001; nrpatel@iirs.gov.in

\* Correspondence: bikashrp@gmail.com; Tel.: +91-8130848255 (B.R.P.)

Received: 13 July 2020; Accepted: 7 August 2020; Published: date

**Supplementary Materials:** The following are available online at [www.mdpi.com/xxx/s1](http://www.mdpi.com/xxx/s1)

**Figure S1.** Trends as estimated using Sen's slope (in mm/year) for the two focal periods (a) 1982–2000 and (b) 2000–2015 for precipitation, whereas (c-d) represents temperature trends (°C/year). Trends are statistically significant when it exceeds  $\pm 0.5$  mm/year for rainfall whereas  $\pm 0.1$ °C/decade for temperature ( $p < 0.1$ ). The Sen's slope was estimated using the IMD-based annual mean data.

**Figure S2.** Trends as estimated using Sen's slope (in  $Wm^{-2}/year$ ) for the two focal periods (a) 1982–2000 and (b) 2000–2015 for incoming solar radiation (SR), whereas (c-d) represents soil moisture (SM) (mm/year). Trends are statistically significant when it exceeds  $\pm 0.25$   $Wm^{-2}/year$  for solar radiation, whereas  $\pm 1.25$  mm/year for soil moisture ( $p < 0.1$ ).

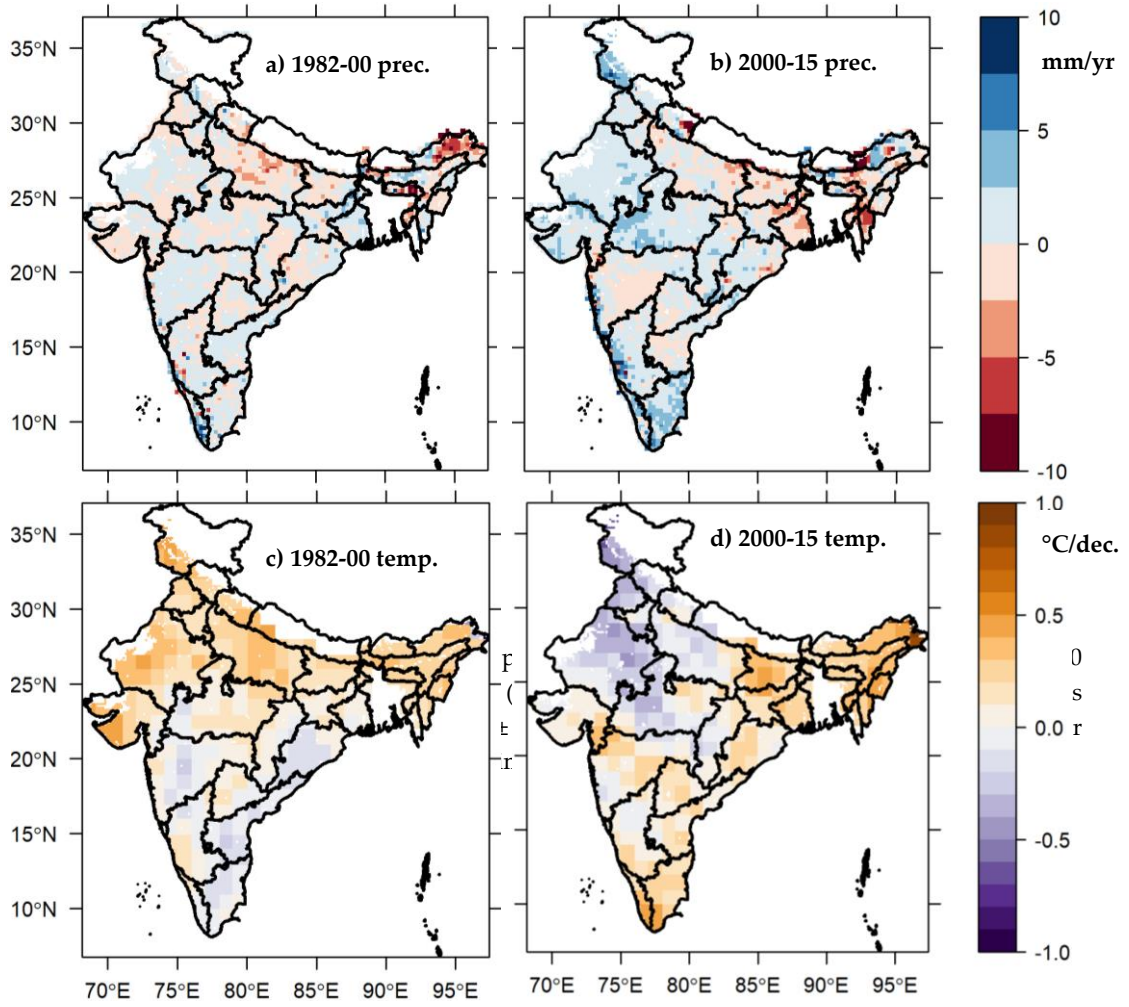

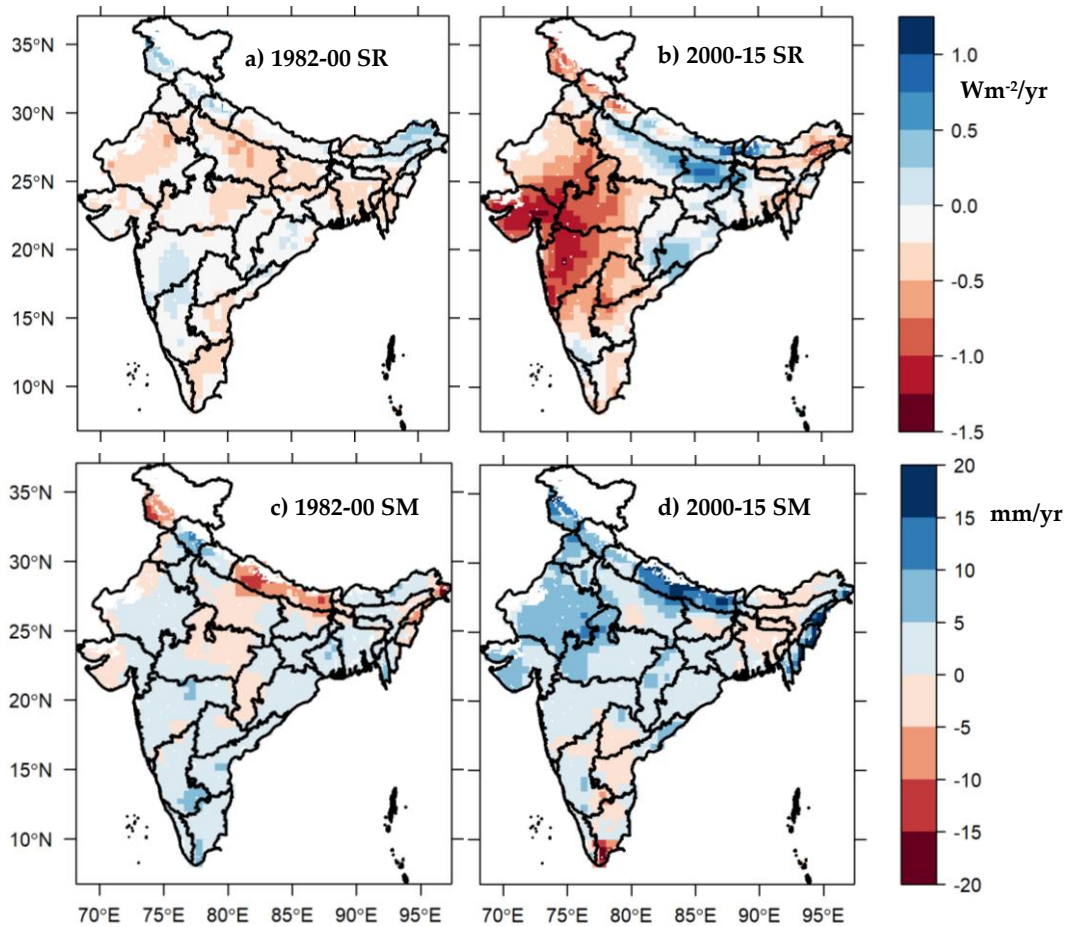

**Figure S2.** Trends as estimated using Sen's slope (in  $\text{Wm}^{-2}/\text{year}$ ) for the two focal periods (a) 1982–2000 and (b) 2000–2015 for incoming solar radiation (SR), whereas (c-d) represents soil moisture (SM) ( $\text{mm}/\text{year}$ ). Trends are statistically significant when it exceeds  $\pm 0.25 \text{ Wm}^{-2}/\text{year}$  for solar radiation, whereas  $\pm 1.25 \text{ mm}/\text{year}$  for soil moisture ( $p < 0.1$ ).

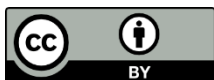

Supplement: s001 [file climate-08-00092-s001.pdf]
